# Supplementary material for: Clinical governance programme in patients with acute coronary syndrome: design and methodology of a quality improvement initiative
Source: PubMed Central journal article supplement — Open Heart. 2020 Dec 28;7(2):e001415. doi: 10.1136/openhrt-2020-001415 (PMC7768950; doi:10.1136/openhrt-2020-001415), 2020-12-28

## APPENDIX

e-Figure 1. ACS Clinical Governance Programme Structure

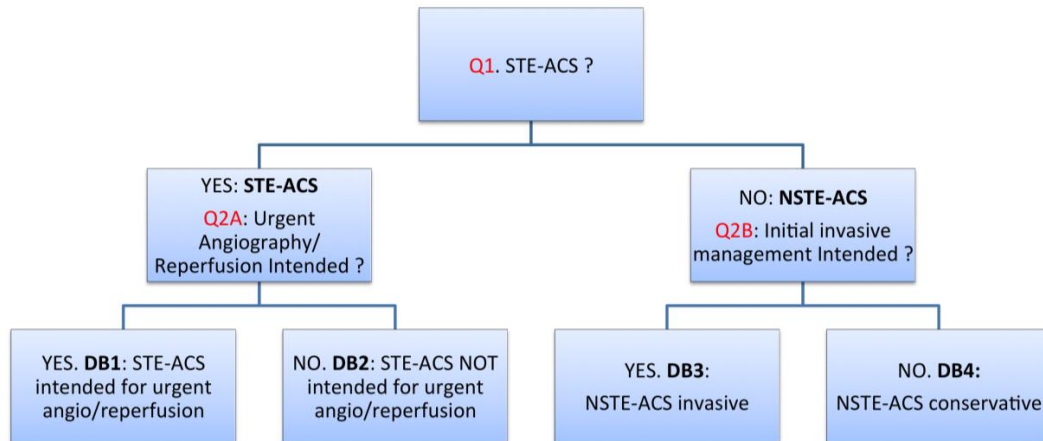

Legend. STE-ACS: ST elevation Acute Coronary Syndromes, NSTEMI-ACS: non ST elevation Acute Coronary Syndromes, angio: coronary angiography

e-Figure 2. Acute Myocardial Infarction patients identified by administrative codes (DRG), by the clinical governance programme, and their overlap in 2016.

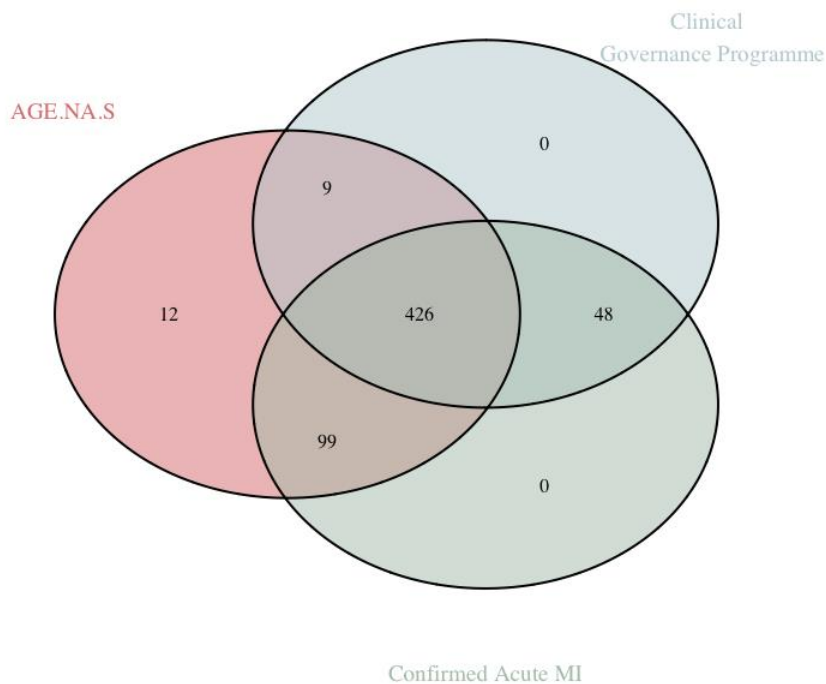

Supplement: openhrt-2020-001415supp001.pdf [file openhrt-2020-001415supp001.pdf]
